# Supplementary material
Source: HighWire-hosted journal article supplement (https://erj.ersjournals.com/content/49/5/1602019)
Supplement: inline-supplementary-material-1 [file inline-supplementary-material-1.pdf]

## Supplementary Data

**Table S1. Maternal and infant characteristics of participants included in the current analysis compared to the full CHILd cohort.**

|                                               | Full Cohort<br>(N=3311) |                       | Current Analysis <sup>1</sup><br>(N=2773) |                       |
|-----------------------------------------------|-------------------------|-----------------------|-------------------------------------------|-----------------------|
|                                               | N                       | n (%) or<br>Mean ± SD | N                                         | n (%) or<br>Mean ± SD |
| <b>Maternal Characteristics</b>               |                         |                       |                                           |                       |
| Age; years                                    | 3305                    | 32.3 ± 4.7            | 2773                                      | 32.3 ± 4.6            |
| Ethnicity; non-Caucasian                      | 3239                    | 881 (27.2)            | 2773                                      | 709 (25.6)            |
| Asthma                                        | 3187                    | 669 (21.0)            | 2773                                      | 589 (21.2)            |
| Postsecondary degree                          | 3159                    | 2414 (76.4)           | 2773                                      | 2138 (77.1)           |
| Smoking                                       | 3191                    | 287 (9.0)             | 2773                                      | 241 (8.7)             |
| <b>Infant Characteristics</b>                 |                         |                       |                                           |                       |
| Sex; male                                     | 3311                    | 1748 (52.8)           | 2773                                      | 1465 (52.8)           |
| Gestational age; weeks                        | 3220                    | 39.2 ± 1.4            | 2773                                      | 39.2 ± 1.4            |
| <b>Breastfeeding at 3 months</b>              |                         |                       |                                           |                       |
| Exclusive                                     | 3152                    | 1885 (59.8)           | 2773                                      | 1643 (59.2)           |
| Partial                                       | 3152                    | 821 (26.0)            | 2773                                      | 723 (26.1)            |
| None                                          | 3152                    | 446 (14.1)            | 2773                                      | 407 (14.7)            |
| <b>Breastfeeding Duration<sup>1</sup></b>     |                         |                       |                                           |                       |
| Never                                         | 2953                    | 114 (3.9)             | 2773                                      | 104 (3.8)             |
| < 3 months                                    | 2953                    | 332 (11.2)            | 2773                                      | 303 (10.9)            |
| 3 to <6 months                                | 2953                    | 278 (9.4)             | 2773                                      | 255 (9.2)             |
| 6 to <12 months                               | 2953                    | 871 (29.5)            | 2773                                      | 826 (29.8)            |
| ≥12 months                                    | 2953                    | 1358 (46.0)           | 2773                                      | 1285 (46.3)           |
| <b>Respiratory Illness in first 12 months</b> |                         |                       |                                           |                       |
| Ever Wheeze (≥1 episode)                      | 2369                    | 534 (22.5)            | 2230                                      | 474 (21.3)            |
| Recurrent (≥2 episodes)                       | 2350                    | 215 (9.1)             | 2214                                      | 199 (9.0)             |
| Frequent colds (≥4 episodes)                  | 2316                    | 866 (37.4)            | 2203                                      | 812 (36.9)            |

<sup>1</sup>Infants with any wheezing data, and complete data for breastfeeding and essential covariates.

Comparisons by chi-squared test (categorical variables) or t-test (continuous variables); no significant differences at p<0.05.

**Table S2. Associations of breastfeeding and recurrent wheezing ( $\geq 2$  episodes) in the first year of life in the CHILD cohort (N=2214)\*.**

| Breastfeeding Measure                     | Prevalence of Recurrent Wheezing | Crude OR (95%CI)   | Adjusted <sup>1</sup> OR (95%CI) |
|-------------------------------------------|----------------------------------|--------------------|----------------------------------|
| <b>Breastfeeding at 3 months</b>          |                                  |                    |                                  |
| None                                      | 39/292 (13.4%)                   | 1.00 (reference)   | 1.00 (reference)                 |
| Partial (with Formula)                    | 62/576 (10.8%)                   | 0.78 (0.51 - 1.20) | 1.05 (0.66 - 1.66)               |
| Exclusive                                 | 98/1346 (7.3%)                   | 0.51 (0.34 - 0.76) | 0.74 (0.48 - 1.13)               |
| <b>Breastfeeding at 6 months</b>          |                                  |                    |                                  |
| None                                      | 59/472 (12.5%)                   | 1.00 (reference)   | 1.00 (reference)                 |
| Partial (with Formula)                    | 60/594 (10.1%)                   | 0.79 (0.54 - 1.15) | 1.04 (0.69 - 1.57)               |
| Partial (without Formula)                 | 51/752 (6.8%)                    | 0.51 (0.34 - 0.76) | 0.67 (0.44 - 1.02)               |
| Exclusive                                 | 25/387 (6.5%)                    | 0.48 (0.30 - 0.79) | 0.66 (0.39 - 1.12)               |
| <b>Breastfeeding Duration<sup>2</sup></b> |                                  |                    |                                  |
| <6 months                                 | 61/478 (12.8%)                   | 1.00 (reference)   | 1.00 (reference)                 |
| 6 to <12 months                           | 71/669 (10.6%)                   | 0.81 (0.56 - 1.17) | 1.07 (0.72 - 1.58)               |
| $\geq 12$ months                          | 67/1067 (6.3%)                   | 0.46 (0.32 - 0.66) | 0.61 (0.41 - 0.91)               |

CI, confidence interval; OR, odds ratio. <sup>1</sup>Adjusted for study site; maternal age, asthma, ethnicity, smoking during pregnancy, postsecondary education; infant sex and gestational age. <sup>2</sup>Refers to any breastfeeding. Associations determined by logistic regression; trend p-values determined by modeling categorical breastfeeding variables as continuous measures. \*2214 infants with complete data for breastfeeding, recurrent wheezing and above covariates.

**Table S3. Associations of breastfeeding and wheezing rates in the first year of life the CHILD cohort, with and without adjustment for frequent colds (N=2203)\*.**

| Breastfeeding Measure                     | Crude<br>RR (95%CI) | Adjusted <sup>1</sup><br>RR (95%CI) | Further Adjusted for<br>Frequent Colds<br>RR (95%CI) |
|-------------------------------------------|---------------------|-------------------------------------|------------------------------------------------------|
| <b>Breastfeeding at 3 months</b>          |                     |                                     |                                                      |
| None                                      | 1.00 (reference)    | 1.00 (reference)                    | 1.00 (reference)                                     |
| Partial (with Formula)                    | 0.78 (0.60 - 1.02)  | 0.97 (0.75 - 1.26)                  | 0.98 (0.76 - 1.26)                                   |
| Exclusive                                 | 0.59 (0.47 - 0.75)  | 0.81 (0.64 - 1.03)                  | 0.77 (0.61 - 0.97)                                   |
| <b>Breastfeeding at 6 months</b>          |                     |                                     |                                                      |
| None                                      | 1.00 (reference)    | 1.00 (reference)                    | 1.00 (reference)                                     |
| Partial (with Formula)                    | 0.78 (0.62 - 0.98)  | 0.98 (0.78 - 1.23)                  | 0.93 (0.75 - 1.17)                                   |
| Partial (without Formula)                 | 0.62 (0.49 - 0.78)  | 0.79 (0.63 - 0.99)                  | 0.76 (0.61 - 0.94)                                   |
| Exclusive                                 | 0.50 (0.37 - 0.67)  | 0.67 (0.50 - 0.90)                  | 0.62 (0.47 - 0.82)                                   |
| <b>Breastfeeding Duration<sup>2</sup></b> |                     |                                     |                                                      |
| <6 months                                 | 1.00 (reference)    | 1.00 (reference)                    | 1.00 (reference)                                     |
| 6 to <12 months                           | 0.83 (0.67 - 1.04)  | 1.02 (0.83 - 1.27)                  | 1.01 (0.82 - 1.24)                                   |
| ≥12 months                                | 0.53 (0.43 - 0.66)  | 0.69 (0.56 - 0.86)                  | 0.64 (0.52 - 0.79)                                   |

CI, confidence interval; RR, rate ratio. <sup>1</sup>Adjusted for study site; maternal age, ethnicity, asthma, smoking during pregnancy, postsecondary education; infant sex and gestational age. <sup>2</sup>Refers to any breastfeeding. Associations determined by Poisson regression. <sup>2</sup>Interaction p-value by modeling interaction terms. \*N=2203 infants with wheezing data and complete data for breastfeeding, above covariates, plus frequent colds.

**Table S4. Associations of breastfeeding and wheezing rates in the first year of life the CHILD cohort, stratified by maternal asthma and infant sex (N=2773).**

| Breastfeeding Measure                     | Maternal Asthma                                      |                                                     | No Maternal Asthma                                    |                                                      | p for effect modification |           |
|-------------------------------------------|------------------------------------------------------|-----------------------------------------------------|-------------------------------------------------------|------------------------------------------------------|---------------------------|-----------|
|                                           | Girls (N=274)<br>Adjusted <sup>1</sup><br>RR (95%CI) | Boys (N=315)<br>Adjusted <sup>1</sup><br>RR (95%CI) | Girls (N=1034)<br>Adjusted <sup>1</sup><br>RR (95%CI) | Boys (N=1150)<br>Adjusted <sup>1</sup><br>RR (95%CI) | by<br>maternal<br>asthma  | by<br>sex |
| <b>Breastfeeding at 3 months</b>          |                                                      |                                                     |                                                       |                                                      |                           |           |
| None                                      | 1.00 (reference)                                     | 1.00 (reference)                                    | 1.00 (reference)                                      | 1.00 (reference)                                     | 0.009                     | 0.08      |
| Partial (with Formula)                    | 1.88 (1.02 - 3.47)                                   | 0.59 (0.34 - 1.04)                                  | 0.88 (0.54 - 1.43)                                    | 0.84 (0.59 - 1.20)                                   |                           |           |
| Exclusive                                 | 1.13 (0.61 - 2.08)                                   | 0.49 (0.29 - 0.82)                                  | 1.46 (0.99 - 2.15)                                    | 0.66 (0.47 - 0.93)                                   |                           |           |
| <b>Breastfeeding at 6 months</b>          |                                                      |                                                     |                                                       |                                                      |                           |           |
| None                                      | 1.00 (reference)                                     | 1.00 (reference)                                    | 1.00 (reference)                                      | 1.00 (reference)                                     | 0.001                     | 0.77      |
| Partial (with Formula)                    | 0.96 (0.56 - 1.67)                                   | 0.80 (0.48 - 1.35)                                  | 1.43 (0.97 - 2.12)                                    | 0.85 (0.61 - 1.17)                                   |                           |           |
| Partial (without Formula)                 | 0.79 (0.44 - 1.43)                                   | 0.63 (0.36 - 1.09)                                  | 1.18 (0.81 - 1.72)                                    | 0.80 (0.58 - 1.11)                                   |                           |           |
| Exclusive                                 | 0.53 (0.23 - 1.21)                                   | 0.32 (0.12 - 0.83)                                  | 1.34 (0.85 - 2.12)                                    | 0.76 (0.51 - 1.13)                                   |                           |           |
| <b>Breastfeeding Duration<sup>2</sup></b> |                                                      |                                                     |                                                       |                                                      |                           |           |
| <6 months                                 | 1.00 (reference)                                     | 1.00 (reference)                                    | 1.00 (reference)                                      | 1.00 (reference)                                     | 0.004                     | 0.09      |
| 6 to <12 months                           | 0.93 (0.54 - 1.61)                                   | 0.87 (0.54 - 1.41)                                  | 2.06 (1.44 - 2.93)                                    | 0.85 (0.62 - 1.16)                                   |                           |           |
| ≥12 months                                | 0.75 (0.43 - 1.31)                                   | 0.45 (0.25 - 0.79)                                  | 0.88 (0.60 - 1.28)                                    | 0.81 (0.60 - 1.11)                                   |                           |           |

CI, confidence interval; RR, rate ratio. <sup>1</sup>Adjusted for study site; maternal age, ethnicity, smoking during pregnancy, postsecondary education; and infant gestational age. <sup>2</sup>Refers to any breastfeeding. Associations determined by Poisson regression. <sup>2</sup>Interaction p-value by modeling interaction terms.
